# Supplementary material for: Selective synthesis of N-aryl hydroxylamines by the hydrogenation of nitroaromatics using supported platinum catalysts
Source: Royal Society of Chemistry journal article supplement (doi:10.1039/b904672k), 2009-01-01
Supplement: b904672k.pdf [file b904672k.pdf]

Supplementary Information

## Selective Synthesis of *N*-Aryl Hydroxylamines by the Hydrogenation of Nitroaromatics Using Supported Platinum Catalysts

Yasumasa Takenaka,<sup>\*a</sup> Takahiro Kiyosu,<sup>b</sup> Jun-Chul Choi,<sup>a</sup> Toshiyasu Sakakura<sup>a</sup> and Hiroyuki Yasuda<sup>\*a</sup>

<sup>a</sup> National Institute of Advanced Industrial Science and Technology (AIST), Tsukuba Central 5, 1-1-1 Higashi, Tsukuba, Ibaraki 305-8565, Japan

<sup>b</sup> Wako Pure Chemical Industries, Ltd., 1633 Matoba, Kawagoe, Saitama 350-1101, Japan

\* Corresponding author. Tel: +81-29-861-4579 & Fax: +81-29-861-4580 (Y. Takenaka)

Tel: +81-29-861-9399 & Fax: +81-29-861-4580 (Y. Yasuda)

E-mail address: takenaka-yasumasa@aist.go.jp (Y. Takenaka), h.yasuda@aist.go.jp (H. Yasuda)

***Reaction Condition of Selective Hydrogenation and Analytical Data of Products***

**Hydrogenation of Nitrobenzene Catalyzed by Pt/SiO<sub>2</sub> under 10 bar of H<sub>2</sub> (Table 1, entry 2).**

Conditions: 10 mL autoclave, 5 wt% Pt/SiO<sub>2</sub> (Escat<sup>TM</sup> 2351: 20 mg), isopropanol (2 mL), dimethyl sulfoxide (0.42 mmol), nitrobenzene (2 mmol), H<sub>2</sub> (10 bar), room temperature, 5 h, giving *N*-phenyl hydroxylamine (PHA) (73.2% HPLC yield, 75.4% selectivity).

**Selective Hydrogenation of Nitrobenzene Catalyzed by Pt/SiO<sub>2</sub> under 1 bar of H<sub>2</sub> (Table 1, entry 3).**

Conditions: 25 mL glass vessel, 5 wt% Pt/SiO<sub>2</sub> (Escat<sup>TM</sup> 2351: 20 mg), isopropanol (2 mL), dimethyl sulfoxide (0.42 mmol), nitrobenzene (2 mmol), H<sub>2</sub> (1 bar), room temperature, 2 h, giving *N*-phenyl hydroxylamine (PHA) (7.2% HPLC yield, 98.6% selectivity).

**Selective Hydrogenation of Nitrobenzene Catalyzed by Pt/SiO<sub>2</sub> with NEt<sub>3</sub> (Table 1, entry 5).**

Conditions: 25 mL glass vessel, 5 wt% Pt/SiO<sub>2</sub> (Escat<sup>TM</sup> 2351: 20 mg), isopropanol (2 mL), dimethyl sulfoxide (0.42 mmol), NEt<sub>3</sub> (0.36 mmol), nitrobenzene (2 mmol), H<sub>2</sub> (1 bar), room temperature, 2 h, giving *N*-phenyl hydroxylamine (PHA) (98.8% HPLC yield, 98.8% selectivity).

**Selective Hydrogenation of Nitrobenzene Catalyzed by Pt/C (Table 1, entry 7).**

Conditions: 25 mL glass vessel, 5 wt% Pt/C (20 mg), isopropanol (2 mL), dimethyl sulfoxide (1.26 mmol), NEt<sub>3</sub> (0.072 mmol), nitrobenzene (2 mmol), H<sub>2</sub> (1 bar), room temperature, 2 h, giving PHA (97.2% HPLC yield, 97.2% selectivity).

**Selective Hydrogenation of Nitrobenzene Catalyzed by Pt/Al<sub>2</sub>O<sub>3</sub> (Table 1, entry 8).**

Conditions: 25 mL glass vessel, 5 wt% Pt/Al<sub>2</sub>O<sub>3</sub> (20 mg), isopropanol (2 mL), dimethyl sulfoxide (1.26 mmol), NEt<sub>3</sub> (0.072 mmol), nitrobenzene (2 mmol), H<sub>2</sub> (1 bar), room temperature, 1.5 h, giving PHA (96.7% HPLC yield, 96.7% selectivity).

**Selective Hydrogenation of Nitrobenzene Catalyzed by Pt/SiO<sub>2</sub> (P) (Table 1, entry 9).**

Conditions: 25 mL glass vessel, 5 wt% Pt/SiO<sub>2</sub> (P) (20 mg), isopropanol (2 mL), dimethyl sulfoxide (0.84 mmol), NEt<sub>3</sub> (0.072 mmol), nitrobenzene (2 mmol), H<sub>2</sub> (1 bar), room temperature, 1.5 h, giving PHA (95.0% HPLC yield, 96.6% selectivity).

**Selective Hydrogenation of Nitrobenzene Catalyzed by Pd/SiO<sub>2</sub> (Table 1, entry 10).**

Conditions: 25 mL glass vessel, 5 wt% Pd/SiO<sub>2</sub> (Escat<sup>TM</sup> 1351: 20 mg), isopropanol (2 mL), dimethyl sulfoxide (0.42 mmol), NEt<sub>3</sub> (0.36 mmol), nitrobenzene (2 mmol), H<sub>2</sub> (1 bar), room temperature, 6 h, giving PHA (15.0% HPLC yield, 15.3% selectivity).

**Selective Hydrogenation of Nitrobenzene Catalyzed by Ru/SiO<sub>2</sub> (P) (Table 1, entry 11).**

Conditions: 25 mL glass vessel, 5 wt% Ru/SiO<sub>2</sub> (P) (20 mg), isopropanol (2 mL), dimethyl sulfoxide (0.42 mmol), NEt<sub>3</sub> (0.36 mmol), nitrobenzene (2 mmol), H<sub>2</sub> (1 bar), room temperature, 12 h, giving PHA (9.0% HPLC yield, 90.0% selectivity).

**Promote Effect of the Addition of Amines (*n*BuNH<sub>2</sub>) (Table 2, entry 7).**

Conditions: 25 mL glass vessel, 5 wt% Pt/SiO<sub>2</sub> (Escat<sup>TM</sup> 2351: 20 mg), isopropanol (2 mL), dimethyl sulfoxide (0.42 mmol), *n*BuNH<sub>2</sub> (0.072 mmol), nitrobenzene (2 mmol), H<sub>2</sub> (1 bar), room temperature, 1 h, giving PHA (77.5% HPLC yield, 99.0% selectivity).

**Selective Hydrogenation of Nitrobenzene in Organic Solvents (THF) (Table 3, entry 5).**

Conditions: 25 mL glass vessel, 5 wt% Pt/SiO<sub>2</sub> (Escat<sup>TM</sup> 2351: 20 mg), THF (2 mL), dimethyl sulfoxide (0.42 mmol), *n*BuNH<sub>2</sub> (0.072 mmol), nitrobenzene (2 mmol), H<sub>2</sub> (1 bar), room temperature, 4.5 h, giving PHA (99.8% HPLC yield, 99.8% selectivity).

**Selective Hydrogenation of Nitrobenzene in NEt<sub>3</sub> (Table 3, entry 11).**

Conditions: 25 mL glass vessel, 5 wt% Pt/SiO<sub>2</sub> (Escat<sup>TM</sup> 2351: 20 mg), NEt<sub>3</sub> (2 mL), dimethyl sulfoxide (0.42 mmol), nitrobenzene (2 mmol), H<sub>2</sub> (1 bar), room temperature, 8 h, giving PHA (94.4% HPLC yield, 99.9% selectivity).

**Hydrogenation of Nitrosobenzene (Figure 2 (a)).**

Conditions: 25 mL glass vessel, 5 wt% Pt/SiO<sub>2</sub> (Escat<sup>TM</sup> 2351: 20 mg), isopropanol (2 mL), dimethyl sulfoxide (0.42 mmol), nitrosobenzene (2 mmol), H<sub>2</sub> (1 bar), room temperature, 30 min, giving PHA (4.2% HPLC yield) and azoxybenzene (47.0% HPLC yield).

**Hydrogenation of Nitrosobenzene with NEt<sub>3</sub> (Figure 2 (b)).**

Conditions: 25 mL glass vessel, 5 wt% Pt/SiO<sub>2</sub> (Escat<sup>TM</sup> 2351: 20 mg), isopropanol (2 mL), dimethyl sulfoxide (0.42 mmol), NEt<sub>3</sub> (0.072 mmol), nitrosobenzene (2 mmol), H<sub>2</sub> (1 bar), room temperature, 30 min, giving PHA (5.8% HPLC yield) and azoxybenzene (47.0% HPLC yield).

**Hydrogenation of Azoxybenzene.**

Conditions: 25 mL glass vessel, 5 wt% Pt/SiO<sub>2</sub> (Escat<sup>TM</sup> 2351: 20 mg), isopropanol (2 mL), dimethyl sulfoxide (0.42 mmol), NEt<sub>3</sub> (0.072 mmol), azoxybenzene (1 mmol), H<sub>2</sub> (1 bar), room temperature, 2 h. Azoxybenzene was not hydrogenated in this reaction conditions.

**Selective Hydrogenation of 4-Cyano Nitrobenzene (Table 4, entry 1).**

Conditions: 25 mL glass vessel, 5 wt% Pt/SiO<sub>2</sub> (Escat<sup>TM</sup> 2351: 20 mg), isopropanol (2 mL), dimethyl sulfoxide (0.42 mmol), *n*BuNH<sub>2</sub> (0.072 mmol), 4-cyano nitrobenzene (2 mmol), H<sub>2</sub> (1 bar), room temperature, 95 min, giving 4-cyano-*N*-phenyl hydroxylamine (98% NMR yield, >99% selectivity). <sup>1</sup>H

NMR (400MHz, CDCl<sub>3</sub>) in crude product:  $\delta$  5.22-6.18 and 6.93-7.00 (br, 2H, *NHOH*), 7.01 (d,  $J_{\text{H-H}} = 8.9$  Hz, 2H, C<sub>6</sub>H<sub>4</sub>), 7.75 (d,  $J_{\text{H-H}} = 8.9$  Hz, 2H, C<sub>6</sub>H<sub>4</sub>).

#### Selective Hydrogenation of 4-Methoxycarbonyl Nitrobenzene (Table 4, entry 2).

Conditions: 25 mL glass vessel, 5 wt% Pt/SiO<sub>2</sub> (Escat<sup>TM</sup> 2351: 20 mg), isopropanol (2 mL), dimethyl sulfoxide (0.42 mmol), *n*BuNH<sub>2</sub> (0.072 mmol), 4-methoxycarbonyl nitrobenzene (2 mmol), H<sub>2</sub> (1 bar), room temperature, 95 min, giving 4-methoxycarbonyl-*N*-phenyl hydroxylamine (>99% NMR yield, >99% selectivity). <sup>1</sup>H NMR (400MHz, CDCl<sub>3</sub>) in crude product:  $\delta$  3.85 (s, 3H, CO<sub>2</sub>CH<sub>3</sub>), 6.98 (d,  $J_{\text{H-H}} = 8.8$  Hz, 2H, C<sub>6</sub>H<sub>4</sub>), 7.75-7.84 (br, 2H, *NHOH*), 7.89 (d,  $J_{\text{H-H}} = 8.8$  Hz, 2H, C<sub>6</sub>H<sub>4</sub>).

Purification by column chromatography on silica gel (Kanto Chemicals, silica gel 60 (spherical), 63-210  $\mu\text{m}$ ) using hexane/ethyl acetate (5/1 and 2/1 v/v) yielded 293 mg (88%) of 4-methoxycarbonyl-*N*-phenyl hydroxylamine ( $R_f = 0.30$ ; hexane/ethyl acetate = 2/1 v/v) as a white solid. <sup>1</sup>H NMR (400MHz, CDCl<sub>3</sub>):  $\delta$  3.89 (s, 3H, CO<sub>2</sub>CH<sub>3</sub>), 5.05-5.45 (br, 1H, *NHOH*), 6.99 (d,  $J_{\text{H-H}} = 8.8$  Hz, 2H, C<sub>6</sub>H<sub>4</sub>-*N-ortho*), 6.70-7.25 (br, 1H, *NHOH*), 7.97 (d,  $J_{\text{H-H}} = 8.8$  Hz, 2H, C<sub>6</sub>H<sub>4</sub>-*N-meta*). <sup>13</sup>C NMR (400MHz, CDCl<sub>3</sub>):  $\delta$  51.85 (CO<sub>2</sub>CH<sub>3</sub>), 112.96 (C<sub>6</sub>H<sub>4</sub>-*N-ortho*), 123.34 (C<sub>6</sub>H<sub>4</sub>-*C-ipso*), 130.98 (C<sub>6</sub>H<sub>4</sub>-*N-ortho*), 153.88 (C<sub>6</sub>H<sub>4</sub>-*N-ipso*), 167.00 (CO<sub>2</sub>CH<sub>3</sub>). IR (KBr): 3341.8, 3248.7, 2956.5, 2360.0, 1929.8, 1684.4, 1603.9, 1582.2, 1514.2, 1489.1, 1436.1, 1406.6, 1374.8, 1323.2, 1293.3, 1261.5, 1198.8, 1172.8, 1125.5, 1026.2, 968.3, 897.9, 846.8, 773.5, 749.9, 702.1, 667.9, 625.0, 517.4, 501.5, 470.7 cm<sup>-1</sup>.

#### Selective Hydrogenation of 4-Chloro Nitrobenzene (Table 4, entry 3).

Conditions: 25 mL glass vessel, 5 wt% Pt/SiO<sub>2</sub> (Escat<sup>TM</sup> 2351: 20 mg), isopropanol (2 mL), dimethyl sulfoxide (0.42 mmol), *n*BuNH<sub>2</sub> (0.072 mmol), 4-chloro nitrobenzene (2 mmol), H<sub>2</sub> (1 bar), room temperature, 100 min, giving 4-chloro-*N*-phenyl hydroxylamine (98% NMR yield, 98% selectivity). <sup>1</sup>H NMR (400MHz, CDCl<sub>3</sub>) in crude product:  $\delta$  5.42-5.76 and 6.68-6.82 (br, 2H, *NHOH*), 6.93 (d,  $J_{\text{H-H}} = 8.9$  Hz, 2H, C<sub>6</sub>H<sub>4</sub>), 7.23 (d,  $J_{\text{H-H}} = 8.9$  Hz, 2H, C<sub>6</sub>H<sub>4</sub>).

#### Selective Hydrogenation of 4-Fluoro Nitrobenzene (Table 4, entry 4).

Conditions: 25 mL glass vessel, 5 wt% Pt/SiO<sub>2</sub> (Escat<sup>TM</sup> 2351: 20 mg), isopropanol (2 mL), dimethyl sulfoxide (0.42 mmol), *n*BuNH<sub>2</sub> (0.072 mmol), 4-fluoro nitrobenzene (2 mmol), H<sub>2</sub> (1 bar), room temperature, 100 min, giving 4-fluoro-*N*-phenyl hydroxylamine (96% NMR yield, 99% selectivity). <sup>1</sup>H NMR (400MHz, CDCl<sub>3</sub>) in crude product:  $\delta$  5.44-5.65 and 6.67-6.79 (br, 2H, *NHOH*), 6.97 and 6.98-6.99 (m, 4H, C<sub>6</sub>H<sub>4</sub>).

#### Selective Hydrogenation of Nitrobenzene (Table 4, entry 5).

Conditions: 25 mL glass vessel, 5 wt% Pt/SiO<sub>2</sub> (Escat<sup>TM</sup> 2351: 20 mg), isopropanol (2 mL), dimethyl sulfoxide (0.42 mmol), *n*BuNH<sub>2</sub> (0.072 mmol), nitrobenzene (2 mmol), H<sub>2</sub> (1 bar), room temperature, 105 min, giving *N*-phenyl hydroxylamine (97.3% HPLC yield, 98.7% selectivity; 98% NMR yield, 99%

selectivity).  $^1\text{H}$  NMR (400MHz,  $\text{CDCl}_3$ ) in crude product:  $\delta$  5.82-6.25 and 6.60-6.90 (br, 2H, *NHOH*), 6.96-7.01 (m, 3H,  $\text{C}_6\text{H}_5$ ), 7.26-7.28 (m, 2H,  $\text{C}_6\text{H}_5$ ).

#### **Selective Hydrogenation of Nitrobenzene by recovered Pt/SiO<sub>2</sub> (Table 4, entry 6).**

After the run of Table 4, entry 5, Pt/SiO<sub>2</sub> catalyst was separated from the product solution by filtration using a PTFE membrane filter (0.5  $\mu\text{m}$ ), washed with IPA (three times of 5 mL), and dried under reduced pressure at room temperature. The recovered Pt/SiO<sub>2</sub> catalyst (20 mg) was then placed in a glass vessel (25 mL) and air was replaced by an argon stream. A Teflon-coated magnetic stir bar, solvent (2 mL), DMSO (0.42 mmol), *n*BuNH<sub>2</sub> (0.072 mmol), and nitroaromatics (2 mmol) were successively placed in the vessel, and the suspension was purged with hydrogen. Then, the reaction mixture was stirred (1500 rpm) under 1 bar of hydrogen at room temperature for 115 min, giving PHA (97.0% HPLC yield, 98.8% selectivity).

#### **Selective Hydrogenation of 4-Vinyl Nitrobenzene (Table 4, entry 7).**

Conditions: 25 mL glass vessel, 5 wt% Pt/SiO<sub>2</sub> (Escat<sup>TM</sup> 2351: 20 mg), isopropanol (2 mL), dimethyl sulfoxide (0.42 mmol), *n*BuNH<sub>2</sub> (0.072 mmol), 4-vinyl nitrobenzene (2 mmol), H<sub>2</sub> (1 bar), room temperature, 180 min, giving 4-vinyl-*N*-phenyl hydroxylamine (97% NMR yield, 97% selectivity).  $^1\text{H}$  NMR (400MHz,  $\text{CDCl}_3$ ) in crude product:  $\delta$  5.02 (dd,  $J_{\text{H-H}} = 11.0, 1.1$  Hz, 1H,  $\text{CH}=\text{CH}_2$ ), 5.60 (dd,  $J_{\text{H-H}} = 17.6, 1.1$  Hz, 1H,  $\text{CH}=\text{CH}_2$ ), 5.02 (dd,  $J_{\text{H-H}} = 17.6, 11.0$  Hz, 1H,  $\text{CH}=\text{CH}_2$ ), 6.94 (d,  $J_{\text{H-H}} = 8.6$  Hz, 2H,  $\text{C}_6\text{H}_4$ ), 7.31 (d,  $J_{\text{H-H}} = 8.6$  Hz, 2H,  $\text{C}_6\text{H}_4$ ), 7.74-7.86 (br, 2H, *NHOH*).

#### **Selective Hydrogenation of 4-Methyl Nitrobenzene (Table 4, entry 8).**

Conditions: 25 mL glass vessel, 5 wt% Pt/SiO<sub>2</sub> (Escat<sup>TM</sup> 2351: 20 mg), isopropanol (2 mL), dimethyl sulfoxide (0.42 mmol), *n*BuNH<sub>2</sub> (0.072 mmol), 4-methyl nitrobenzene (2 mmol), H<sub>2</sub> (1 bar), room temperature, 180 min, giving 4-methyl-*N*-phenyl hydroxylamine (97% NMR yield, 98% selectivity).  $^1\text{H}$  NMR (400MHz,  $\text{CDCl}_3$ ) in crude product:  $\delta$  2.30 (s, 3H,  $\text{CH}_3$ ), 5.22-5.57 and 6.63-6.82 (br, 2H, *NHOH*), 6.91 (d,  $J_{\text{H-H}} = 8.5$  Hz, 2H,  $\text{C}_6\text{H}_4$ ), 7.09 (d,  $J_{\text{H-H}} = 8.5$  Hz, 2H,  $\text{C}_6\text{H}_4$ ).

#### **Selective Hydrogenation of 3-Methyl Nitrobenzene (Table 4, entry 9).**

Conditions: 25 mL glass vessel, 5 wt% Pt/SiO<sub>2</sub> (Escat<sup>TM</sup> 2351: 20 mg), isopropanol (2 mL), dimethyl sulfoxide (0.42 mmol), *n*BuNH<sub>2</sub> (0.072 mmol), 3-methyl nitrobenzene (2 mmol), H<sub>2</sub> (1 bar), room temperature, 150 min, giving 3-methyl-*N*-phenyl hydroxylamine (98% NMR yield, 98% selectivity).  $^1\text{H}$  NMR (400MHz,  $\text{CDCl}_3$ ) in crude product:  $\delta$  2.29 (s, 3H,  $\text{CH}_3$ ), 6.70-7.11 (br, 2H, *NHOH*), 6.76, 6.77 and 6.78 (m, 3H,  $\text{C}_6\text{H}_4$ ), 7.13 (t,  $J_{\text{H-H}} = 7.6$  Hz, 1H,  $\text{C}_6\text{H}_4$ ).

#### **Selective Hydrogenation of 2-Methyl Nitrobenzene (Table 4, entry 10).**

Conditions: 25 mL glass vessel, 5 wt% Pt/SiO<sub>2</sub> (Escat<sup>TM</sup> 2351: 20 mg), isopropanol (2 mL), dimethyl sulfoxide (0.42 mmol), *n*BuNH<sub>2</sub> (0.072 mmol), 2-methyl nitrobenzene (2 mmol), H<sub>2</sub> (1 bar), room temperature, 300 min, giving 2-methyl-*N*-phenyl hydroxylamine (97% NMR yield, 97% selectivity).  $^1\text{H}$

NMR (400MHz, CDCl<sub>3</sub>) in crude product:  $\delta$  2.15 (s, 3H, CH<sub>3</sub>), 5.22-5.75 and 6.62-6.84 (br, 2H, NHOH), 6.90 (t,  $J_{\text{H-H}} = 7.3, 7.2$  Hz, 1H, C<sub>6</sub>H<sub>4</sub>), 7.08 (d,  $J_{\text{H-H}} = 7.3$  Hz, 1H, C<sub>6</sub>H<sub>4</sub>), 7.21-7.24 (m,  $J_{\text{H-H}} = 7.3, 7.2$  Hz, 2H, C<sub>6</sub>H<sub>4</sub>).

**Selective Hydrogenation of 4-Methoxy Nitrobenzene (Table 4, entry 11).**

Conditions: 25 mL glass vessel, 5 wt% Pt/SiO<sub>2</sub> (Escat<sup>TM</sup> 2351: 20 mg), isopropanol (2 mL), dimethyl sulfoxide (0.42 mmol), *n*BuNH<sub>2</sub> (0.072 mmol), 4-methoxy nitrobenzene (2 mmol), H<sub>2</sub> (1 bar), room temperature, 300 min, giving 4-methoxy-*N*-phenyl hydroxylamine (96% NMR yield, 97% selectivity). <sup>1</sup>H NMR (400MHz, CDCl<sub>3</sub>) in crude product:  $\delta$  3.79 (s, 3H, OCH<sub>3</sub>), 5.58-5.85 and 6.54-6.80 (br, 2H, NHOH), 6.85 (d,  $J_{\text{H-H}} = 8.9$  Hz, 2H, C<sub>6</sub>H<sub>4</sub>), 7.00 (d,  $J_{\text{H-H}} = 8.9$  Hz, 2H, C<sub>6</sub>H<sub>4</sub>).
